# Supplementary material
Source: PubMed Central journal article supplement (PMC3181368)

**Fig. S1****A**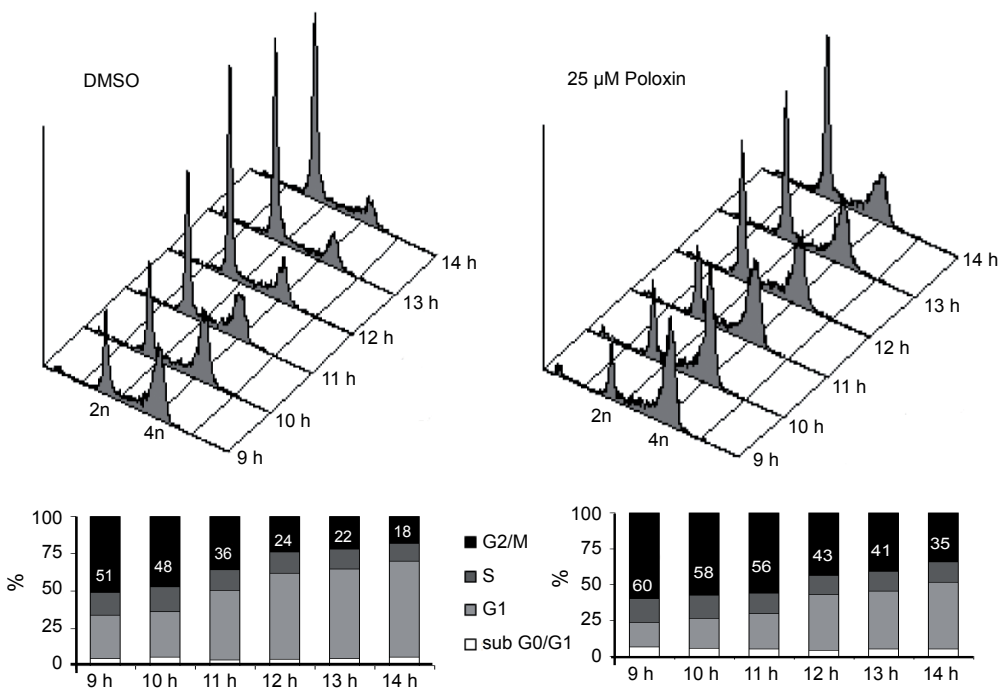**B**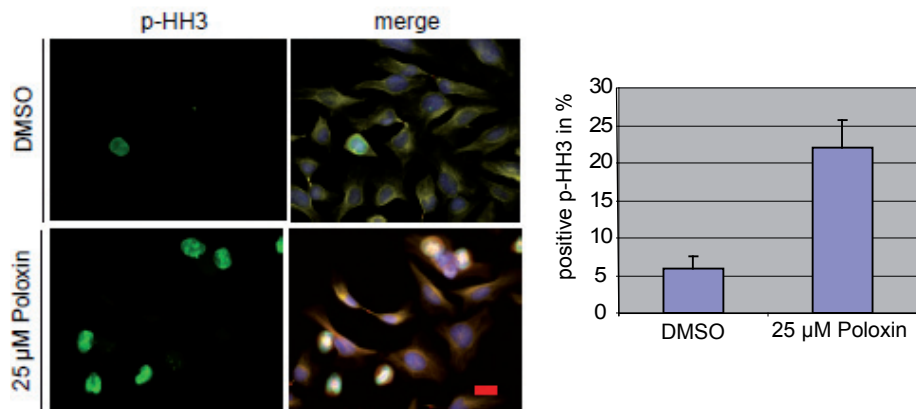

Supplement: mmc1.pdf [file mmc1.pdf]

**Fig. S2**

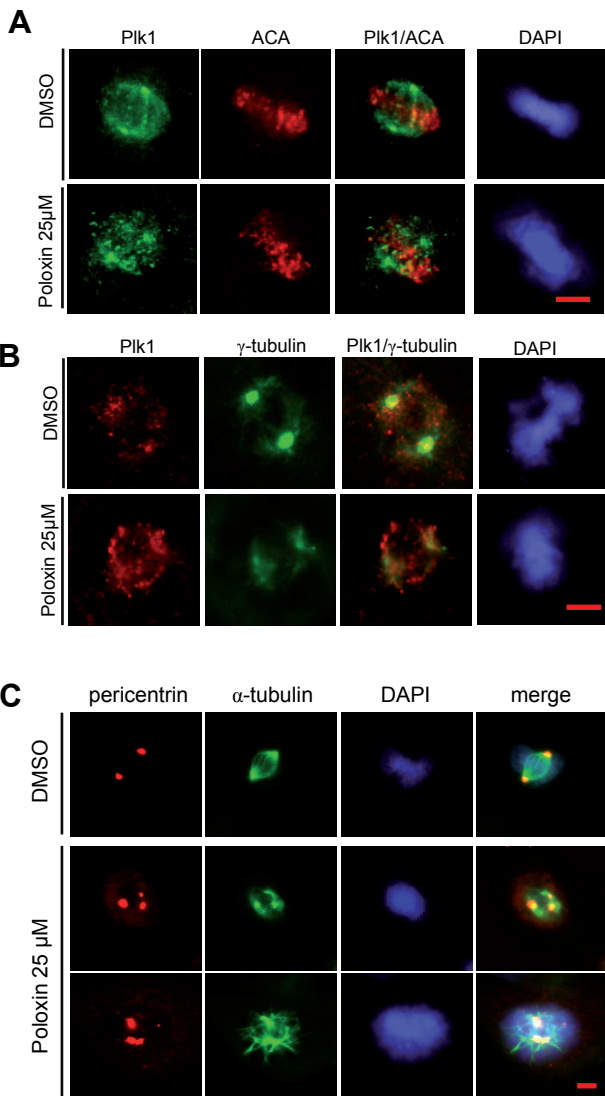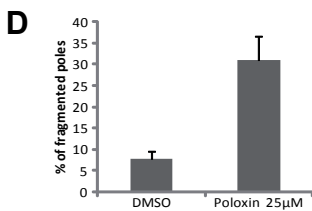

Supplement: mmc2.pdf [file mmc2.pdf]

**Fig. S3**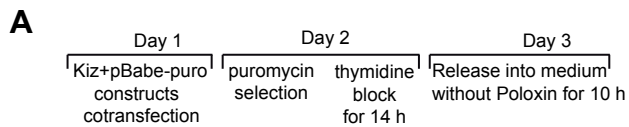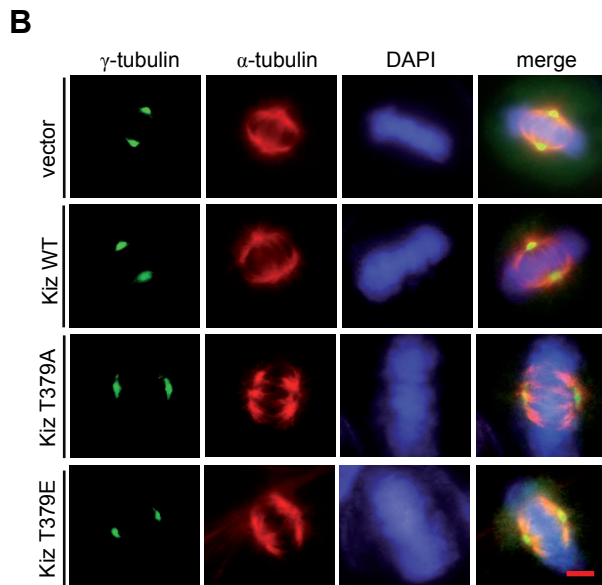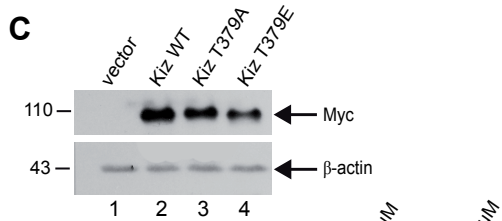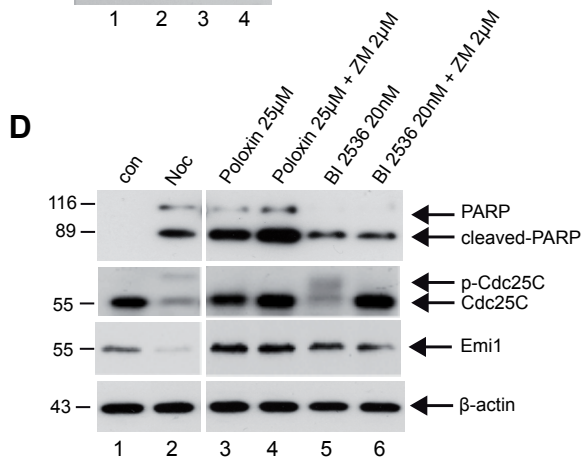

Supplement: mmc3.pdf [file mmc3.pdf]

**Fig. S4**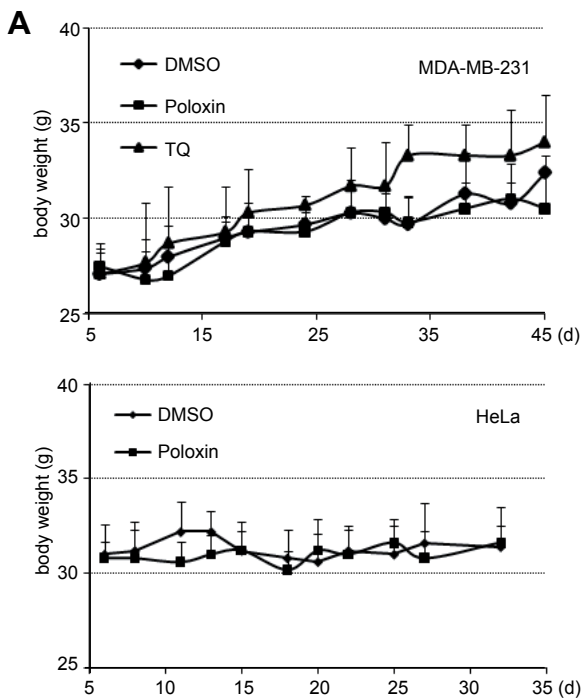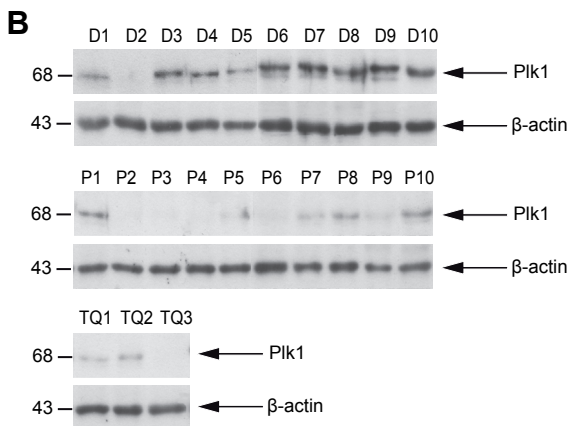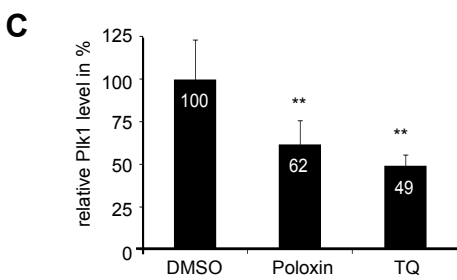

Supplement: mmc4.pdf [file mmc4.pdf]
